# Supplementary material for: Liquid biofuels as a development tool in Latin American agriculture.
Source: Springer Nature journal article supplement (doi:10.1186/s12885-015-1497-1), 1985-01-01
Supplement: MOESM1 [file 9744776]

## APPENDIX 1 – NATIONAL CANCER REGISTRATION SERVICE (NCRS) DATA

The NCRS for England follows the Union for International Cancer Control (UICC) 'TNM' tumour staging criteria. Some registry offices enter staging information as a number in the 'Stage Best' field in the NCRS. Other registry offices enter staging information in the 'T Best', 'N Best', and 'M Best' fields and/or the 'T Path', 'N Path', and 'M Path' fields (which are based on pathology). Some registry offices enter information in both. Where there was a valid entry in the 'Stage Best' field, this was used; otherwise stage was derived from the separate 'T', 'N', and 'M' fields by applying the UICC TNM staging criteria (version 7) to the 'Best' fields if they contained information and the 'Path' fields if not.

### TNM classification for each cancer site

Source: Sobin LH, Gospodarowicz MK, Wittekind C. TNM Classification of Malignant Tumours, 7<sup>th</sup> edition. John Wiley & Sons, 2011.

#### *Breast Cancer:*

|         | <b>Stage</b> | <b>T</b> | <b>N</b> | <b>M</b> |
|---------|--------------|----------|----------|----------|
| Stage 1 | I            | 1        | 0        | 0        |
| Stage 2 | Ia           | 0        | 1        | 0        |
| Stage 2 | Ia           | 1        | 1        | 0        |
| Stage 2 | Ia           | 2        | 0        | 0        |
| Stage 2 | Ib           | 2        | 1        | 0        |
| Stage 2 | Ib           | 3        | 0        | 0        |
| Stage 3 | Ia           | 0        | 2        | 0        |
| Stage 3 | Ia           | 1        | 2        | 0        |
| Stage 3 | Ia           | 2        | 2        | 0        |
| Stage 3 | Ia           | 3        | 1 or 2   | 0        |
| Stage 3 | Ib           | 4        | Any      | 0        |
| Stage 3 | Ib           | Any      | 3        | 0        |
| Stage 4 | IV           | Any      | Any      | 1        |

#### *Colorectal Cancer:*

|         | <b>Stage</b> | <b>T</b> | <b>N</b> | <b>M</b> |
|---------|--------------|----------|----------|----------|
| Stage 1 | I            | 1        | 0        | 0        |
| Stage 1 | I            | 2        | 0        | 0        |
| Stage 2 | II           | 3        | 0        | 0        |
| Stage 2 | II           | 4        | 0        | 0        |
| Stage 3 | III          | Any      | 1 or 2   | 0        |
| Stage 4 | IV           | Any      | Any      | 1        |

*Lung Cancer:*

|         | <b>Stage</b> | <b>T</b> | <b>N</b> | <b>M</b> |
|---------|--------------|----------|----------|----------|
| Stage 1 | Ia           | 1        | 0        | 0        |
| Stage 1 | Ib           | 2        | 0        | 0        |
| Stage 2 | IIa          | 1        | 1        | 0        |
| Stage 2 | IIb          | 2        | 1        | 0        |
| Stage 2 | IIb          | 3        | 0        | 0        |
| Stage 3 | IIIa         | 1        | 2        | 0        |
| Stage 3 | IIIa         | 2        | 2        | 0        |
| Stage 3 | IIIa         | 3        | 1 or 2   | 0        |
| Stage 3 | IIIb         | Any      | 3        | 0        |
| Stage 3 | IIIb         | 4        | Any      | 0        |
| Stage 4 | IV           | Any      | Any      | 1        |

*Prostate Cancer:*

|         | <b>Stage</b> | <b>T</b> | <b>N</b> | <b>M</b> | <b>Grade</b> |
|---------|--------------|----------|----------|----------|--------------|
| Stage 1 | I            | 1a       | 0        | 0        | G1           |
| Stage 2 | II           | 1a       | 0        | 0        | G2-4         |
| Stage 2 | II           | 1b       | 0        | 0        | Any          |
| Stage 2 | II           | 1c       | 0        | 0        | Any          |
| Stage 2 | II           | 1        | 0        | 0        | Any          |
| Stage 2 | II           | 2        | 0        | 0        | Any          |
| Stage 3 | III          | 3        | 0        | 0        | Any          |
| Stage 4 | IV           | 4        | 0        | 0        | Any          |
| Stage 4 | IV           | Any      | 1        | 0        | Any          |
| Stage 4 | IV           | Any      | Any      | 1        | Any          |

**SUPPLEMENTARY TABLE 'A' – EXPOSURE VARIABLES EXPLAINED**

|               | Name                      | Description                                                                                                                                          | How operationalised                                                                                                                                                                                                                                                                                                                                                                                                                                                    |                                                                                             |
|---------------|---------------------------|------------------------------------------------------------------------------------------------------------------------------------------------------|------------------------------------------------------------------------------------------------------------------------------------------------------------------------------------------------------------------------------------------------------------------------------------------------------------------------------------------------------------------------------------------------------------------------------------------------------------------------|---------------------------------------------------------------------------------------------|
| Patient level | Patient age               | Patient age from cancer registry, 2012                                                                                                               | Grouped into age bands. Adults only.                                                                                                                                                                                                                                                                                                                                                                                                                                   |                                                                                             |
|               | Patient sex               | Patient sex from cancer registry, 2012                                                                                                               |                                                                                                                                                                                                                                                                                                                                                                                                                                                                        |                                                                                             |
|               | Patient ethnicity         | Patient ethnicity from cancer registry, 2012                                                                                                         | Categorised into 'white' and 'non-white'. Due to small numbers of non-white ethnicity unable to sub-group further.                                                                                                                                                                                                                                                                                                                                                     |                                                                                             |
|               | Patient level deprivation | Patient level deprivation from cancer registry, 2012. Derived from patient postcode using income domain of index of multiple deprivation (IMD) 2010. | Quintiles                                                                                                                                                                                                                                                                                                                                                                                                                                                              |                                                                                             |
| GP level      | Demographic factors       | Training practice                                                                                                                                    | Whether practice is a training practice or not, i.e. whether it has GP registrars. From GP workforce survey 2012.                                                                                                                                                                                                                                                                                                                                                      | Binary                                                                                      |
|               |                           | GPs 50 years and over                                                                                                                                | Proportion of GPs working at practice aged 50 years and over. From GP workforce survey 2012.                                                                                                                                                                                                                                                                                                                                                                           | Divided into 'some', 'none' or 'all', as per previous studies. (Bottle <i>et al</i> , 2012) |
|               |                           | GPs female                                                                                                                                           | Sex of GPs working at practice. From GP workforce survey 2012.                                                                                                                                                                                                                                                                                                                                                                                                         | Divided into 'some', 'none' or 'all', as per previous studies. (Bottle <i>et al</i> , 2012) |
|               |                           | GPs primary UK qualification                                                                                                                         | Whether GPs primary medical qualification was from the UK. From GP workforce survey 2012.                                                                                                                                                                                                                                                                                                                                                                              | Divided into 'some', 'none' or 'all', as per previous studies. (Bottle <i>et al</i> , 2012) |
|               |                           | GP income deprivation                                                                                                                                | The index of multiple deprivation is derived from 7 domains; income, employment, health & disability, education skills & training, barriers to housing & services, crime and living environment. The GP practice income IMD is estimated by taking a weighted average of the income IMD scores of each LSOA in which a given practice has registrations. The weights are % of the practice's registrations in each LSOA. From NHS Health and Social Care Centre, 2011. | Quintiles                                                                                   |
|               |                           | Rurality                                                                                                                                             | Rurality of the GP practice is based on population density of the practice postcode, from 2001 census. Data from Health and Social Care Information Centre, 2011.                                                                                                                                                                                                                                                                                                      | Pre-determined categories.                                                                  |
|               |                           | Number of patients per GP                                                                                                                            | Calculated as list size divided by GP full time equivalent, to give average number of patients per GP as each practice. GP practice list size from QOF 2011/12. Full time equivalent GP practitioners from GP workforce survey 2012.                                                                                                                                                                                                                                   | Quintiles                                                                                   |
|               |                           | Total QOF points                                                                                                                                     | Total points from Quality Outcome Framework, 2011/12. Maximum achievable 1,000.                                                                                                                                                                                                                                                                                                                                                                                        | Divided into groups based on spread of data.                                                |
| General       | Able to book              | Percentage of patients responding 'yes' to question 'Were you able to get an                                                                         | Divided into categories based on spread of                                                                                                                                                                                                                                                                                                                                                                                                                             |                                                                                             |

|                         |                                                       |                                                                                                                                                                                                                                                                                                                                                                                                                                                                                                                                                                                                                                                                                                               |                                                                                                                                                                                                                                                                                                                                                                                                                                                                                               |
|-------------------------|-------------------------------------------------------|---------------------------------------------------------------------------------------------------------------------------------------------------------------------------------------------------------------------------------------------------------------------------------------------------------------------------------------------------------------------------------------------------------------------------------------------------------------------------------------------------------------------------------------------------------------------------------------------------------------------------------------------------------------------------------------------------------------|-----------------------------------------------------------------------------------------------------------------------------------------------------------------------------------------------------------------------------------------------------------------------------------------------------------------------------------------------------------------------------------------------------------------------------------------------------------------------------------------------|
| factors                 | appointment                                           | appointment see or speak to someone?' within GP Survey 2011/12.<br><br>Weighted responses have been used as these try to remove any bias introduced by response bias (adjusts the data to account for potential differences between the demographic profile of all eligible patients in a practice and the patients who actually completed the questionnaire). In 2011/12, 1 million people responded to the question 'were you able to get an appointment to see or speak to someone'.                                                                                                                                                                                                                       | data. Division into categories makes easier for interpretation than division into tertiles.                                                                                                                                                                                                                                                                                                                                                                                                   |
|                         | Able to see preferred GP                              | Percentage of patients responding 'always', 'almost always' or 'a lot of the time' to question 'Were you able to see your preferred doctor?' within 2010/11 GP Survey (of those that said they had a preferred doctor).<br><br>Weighted responses have been used as these try to remove any bias introduced by response bias (adjusts the data to account for potential differences between the demographic profile of all eligible patients in a practice and the patients who actually completed the questionnaire). In 2010/11, 1.17million (% of 1.93 who answered question) had a preferred doctor with 1.16 million of these (99%) answering the question 'how often do you see your preferred doctor'. | Divided into categories based on spread of data and easier for interpretation than division into tertiles.<br>Data from 2010/11 used instead of 2011/12 as more complete. Strong correlation between 2011/12 and 2010/11 data. Due to the changes to the questionnaire design and survey frequency, as well as the change to the weighting methodology results from 2011/12 onwards cannot be compared with previous years, therefore 2010/11 data was not input for missing data of 2011/12. |
| Cancer specific factors | Two week wait referral rate                           | Two week wait referrals 2011/12. Number per 100,000 population. From National Cancer Intelligence Network Practice Profiles (NCIN), 2012.                                                                                                                                                                                                                                                                                                                                                                                                                                                                                                                                                                     | Divided into quintiles due to spread of data.                                                                                                                                                                                                                                                                                                                                                                                                                                                 |
|                         | Two week wait conversion                              | Two week wait conversion 2011/12. Percentage of all two week wait referrals with cancer. From NCIN Practice Profiles, 2012.                                                                                                                                                                                                                                                                                                                                                                                                                                                                                                                                                                                   | Quintiles                                                                                                                                                                                                                                                                                                                                                                                                                                                                                     |
|                         | Two week wait detection                               | Number of new cancers treated, percentage of which are two week wait 2011/12. From National Cancer Intelligence Network Practice Profiles, 2012.                                                                                                                                                                                                                                                                                                                                                                                                                                                                                                                                                              | Quintiles                                                                                                                                                                                                                                                                                                                                                                                                                                                                                     |
| Other factors           | Average colonoscopy, sigmoidoscopy and endoscopy rate | Average of in-patient or day case colonoscopy, sigmoidoscopy and upper gastrointestinal endoscopy. Number per 100,000 population. From National Cancer Intelligence Network Practice Profiles, 2012.                                                                                                                                                                                                                                                                                                                                                                                                                                                                                                          | Divided into tertiles due to spread of data and as per previous study. (Shawihdi <i>et al</i> , 2012)                                                                                                                                                                                                                                                                                                                                                                                         |
|                         | Emergency presentations                               | Number of persons diagnosed via an emergency route, as defined by the Routes to Diagnosis project methodology.[i] Percentage of presentations. From National Cancer Intelligence Network Practice Profiles, 2012.                                                                                                                                                                                                                                                                                                                                                                                                                                                                                             | Quintiles                                                                                                                                                                                                                                                                                                                                                                                                                                                                                     |

i. Elliss-Brookes L, McPhail S, Ives A, Greenslade M, Shelton J, Hiom S, et al. Routes to diagnosis for cancer – determining the patient journey using multiple data sets. *Br J Cancer*. 2012;107(8):1220-6.

### SUPPLEMENTARY FIGURE 'A' – CONCEPTUAL MODEL

We felt that the GP characteristics included in the study measured certain aspects of primary care associated with the stage of cancer at diagnosis. These are shown in the conceptual model below, and appeared to be likely to be related with one another along the causal pathway. A number of these will impact on primary care delay, whilst some will impact on patient delay.

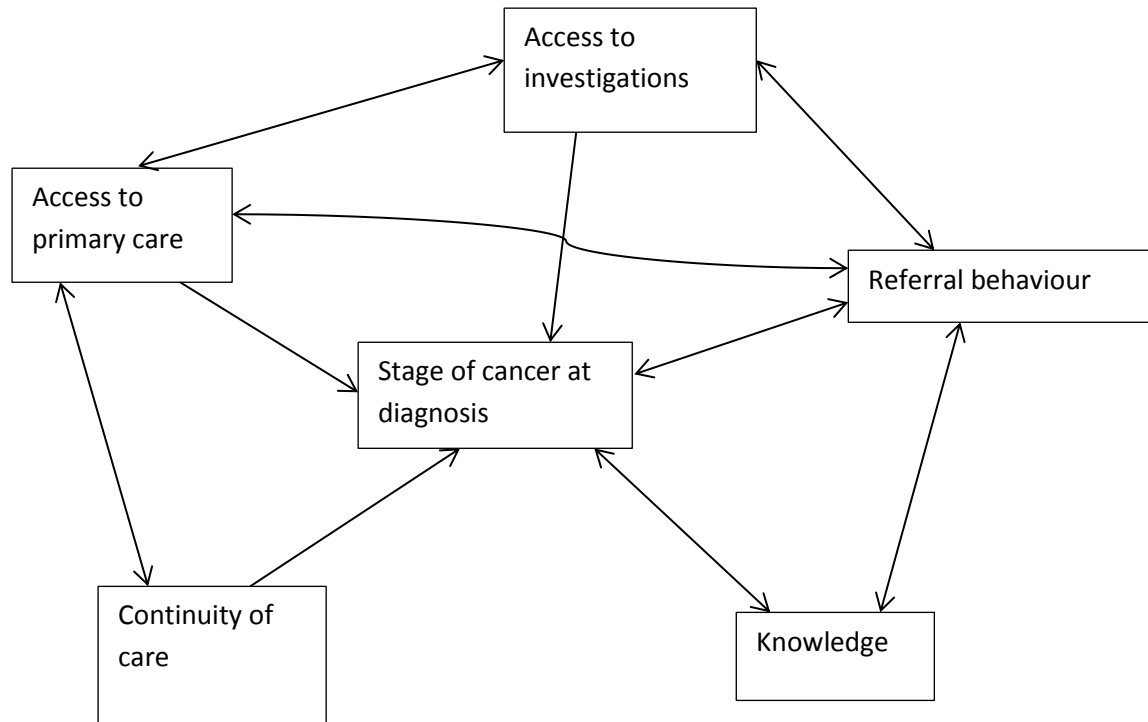

**SUPPLEMENTARY TABLE 'B' – NUMBER AND PERCENTAGE OF TUMOURS OF EACH CANCER TYPE AND STAGE**

| Exposure variables               | Female breast cancer (n=34,119) |        |                        |        | Prostate cancer (n=27,880) |        |                         |        | Colorectal cancer (n=27,079) |        |                         |        | Lung cancer (n=28,479) |        |                         |        |
|----------------------------------|---------------------------------|--------|------------------------|--------|----------------------------|--------|-------------------------|--------|------------------------------|--------|-------------------------|--------|------------------------|--------|-------------------------|--------|
|                                  | Stage 1&2<br>(n=28,453)         |        | Stage 3&4<br>(n=5,666) |        | Stage 1&2<br>(n=17,124)    |        | Stage 1&2<br>(n=17,124) |        | Stage 3&4<br>(n=10,756)      |        | Stage 3&4<br>(n=14,793) |        | Stage 1&2<br>(n=6,959) |        | Stage 3&4<br>(n=21,520) |        |
| <b>Age</b>                       |                                 |        |                        |        |                            |        |                         |        |                              |        |                         |        |                        |        |                         |        |
| 15-44 years                      | 2,652                           | (9.3%) | 663                    | (11.7) | 47                         | (0.3)  | 13                      | (0.1)  | 332                          | (2.7)  | 561                     | (3.8)  | 86                     | (1.2)  | 221                     | (1.0)  |
| 45-64 years                      | 13,388                          | (47.1) | 2,300                  | (40.6) | 4,845                      | (28.3) | 2,346                   | (21.8) | 2,905                        | (23.5) | 4,096                   | (27.8) | 1,437                  | (20.6) | 5,340                   | (24.8) |
| 65+ years                        | 12,413                          | (43.6) | 2,703                  | (47.7) | 12,232                     | (71.4) | 8,397                   | (78.1) | 9,103                        | (73.8) | 10,082                  | (68.4) | 5,436                  | (78.1) | 15,959                  | (74.2) |
| <b>Sex</b>                       |                                 |        |                        |        |                            |        |                         |        |                              |        |                         |        |                        |        |                         |        |
| Male                             | -----                           | -----  | -----                  | -----  | 17,124                     | (100)  | 10,756                  | (100)  | 7,055                        | (57.2) | 8,406                   | (57.0) | 3,606                  | (51.8) | 12,054                  | (56.0) |
| Female                           | 28,453                          | (100)  | 5,666                  | (100)  | -----                      | -----  | -----                   | -----  | 5,285                        | (42.8) | 6,333                   | (43.0) | 3,353                  | (48.2) | 9,466                   | (44.0) |
| <b>Ethnicity</b>                 |                                 |        |                        |        |                            |        |                         |        |                              |        |                         |        |                        |        |                         |        |
| White                            | 17,331                          | (60.9) | 3,464                  | (61.1) | 8,228                      | (48.0) | 5,773                   | (53.7) | 7,757                        | (62.9) | 9,752                   | (65.9) | 4,729                  | (68.0) | 14,514                  | (67.4) |
| Non-white                        | 786                             | (2.8)  | 230                    | (4.1)  | 342                        | (2.0)  | 186                     | (1.7)  | 229                          | (1.9)  | 380                     | (2.6)  | 127                    | (1.8)  | 375                     | (1.7)  |
| Missing                          | 10,336                          | (36.3) | 1,972                  | (34.8) | 8,554                      | (50.0) | 4,797                   | (44.6) | 4,354                        | (35.3) | 4,661                   | (31.5) | 2,103                  | (30.2) | 6,631                   | (30.8) |
| <b>Deprivation</b>               |                                 |        |                        |        |                            |        |                         |        |                              |        |                         |        |                        |        |                         |        |
| Q1 (least deprived)              | 6,271                           | (22.0) | 1,167                  | (20.6) | 4,147                      | (24.2) | 2,347                   | (21.8) | 2,681                        | (21.7) | 3,169                   | (21.5) | 956                    | (13.7) | 3,008                   | (14.0) |
| Q2                               | 6,602                           | (23.2) | 1,172                  | (20.7) | 4,237                      | (24.7) | 2,625                   | (24.4) | 2,772                        | (22.5) | 3,222                   | (21.9) | 1,294                  | (18.6) | 3,973                   | (18.5) |
| Q3                               | 6,276                           | (22.1) | 1,169                  | (20.6) | 3,706                      | (21.6) | 2,356                   | (21.9) | 2,702                        | (21.9) | 3,153                   | (21.4) | 1,384                  | (19.9) | 4,433                   | (20.6) |
| Q4                               | 5,200                           | (18.3) | 1,159                  | (20.5) | 2,866                      | (16.7) | 1,930                   | (17.9) | 2,317                        | (18.8) | 2,853                   | (19.4) | 1,566                  | (22.5) | 4,855                   | (22.6) |
| Q5 (most deprived)               | 4,104                           | (14.4) | 999                    | (17.6) | 2,168                      | (12.7) | 1,498                   | (13.9) | 1,868                        | (15.1) | 2,342                   | (15.9) | 1,759                  | (25.3) | 5,251                   | (24.4) |
| <b>Number of patients per GP</b> |                                 |        |                        |        |                            |        |                         |        |                              |        |                         |        |                        |        |                         |        |
| Q1 (lowest)                      | 5,700                           | (20.0) | 1,147                  | (20.2) | 3,417                      | (20.0) | 2,241                   | (20.8) | 2,542                        | (20.6) | 2,938                   | (19.9) | 1,443                  | (20.7) | 4,236                   | (19.7) |
| Q2                               | 5,606                           | (19.7) | 1,120                  | (19.8) | 3,338                      | (19.5) | 2,084                   | (19.4) | 2,422                        | (19.6) | 2,915                   | (19.8) | 1,422                  | (20.4) | 4,298                   | (20.0) |
| Q3                               | 5,777                           | (20.3) | 1,098                  | (19.4) | 3,408                      | (19.9) | 2,153                   | (20.0) | 2,383                        | (19.3) | 2,878                   | (19.5) | 1,373                  | (19.7) | 4,170                   | (19.4) |
| Q4                               | 5,525                           | (19.4) | 1,137                  | (20.1) | 3,394                      | (19.8) | 2,156                   | (20.0) | 2,449                        | (19.8) | 3,021                   | (20.5) | 1,345                  | (19.3) | 4,323                   | (20.1) |
| Q5 (highest)                     | 5,845                           | (20.5) | 1,164                  | (20.5) | 3,567                      | (20.8) | 2,122                   | (19.7) | 2,544                        | (20.6) | 2,987                   | (20.3) | 1,376                  | (19.8) | 4,493                   | (20.9) |
| <b>Training practice</b>         |                                 |        |                        |        |                            |        |                         |        |                              |        |                         |        |                        |        |                         |        |
| No                               | 15,802                          | (55.5) | 3,241                  | (57.2) | 9,752                      | (56.9) | 6,039                   | (56.1) | 6,958                        | (56.4) | 8,345                   | (56.6) | 2,915                  | (41.9) | 8,850                   | (41.1) |
| Yes                              | 12,651                          | (44.5) | 2,425                  | (42.8) | 7,372                      | (43.1) | 4,717                   | (43.9) | 5,382                        | (43.6) | 6,394                   | (43.4) | 4,044                  | (58.1) | 12,670                  | (58.9) |
| <b>GPs aged 50 and over</b>      |                                 |        |                        |        |                            |        |                         |        |                              |        |                         |        |                        |        |                         |        |
| Some                             | 24,713                          | (86.9) | 4,876                  | (86.1) | 14,766                     | (86.2) | 9,337                   | (86.8) | 10,631                       | (86.2) | 12,721                  | (86.3) | 5,899                  | (84.8) | 18,337                  | (85.2) |
| None                             | 2,148                           | (7.5)  | 442                    | (7.8)  | 1,309                      | (7.6)  | 812                     | (7.5)  | 996                          | (8.1)  | 1,135                   | (7.7)  | 657                    | (9.4)  | 1,785                   | (8.3)  |
| All                              | 1,592                           | (5.6)  | 348                    | (6.1)  | 1,049                      | (6.1)  | 607                     | (5.6)  | 713                          | (5.8)  | 883                     | (6.0)  | 403                    | (5.8)  | 1,398                   | (6.5)  |
| <b>GPs female</b>                |                                 |        |                        |        |                            |        |                         |        |                              |        |                         |        |                        |        |                         |        |
| Some                             | 25,939                          | (91.2) | 5,136                  | (90.6) | 15,470                     | (90.3) | 9,744                   | (90.6) | 11,179                       | (90.6) | 13,394                  | (90.9) | 6,253                  | (89.9) | 19,305                  | (89.7) |
| None                             | 2,069                           | (7.3)  | 408                    | (7.2)  | 1,381                      | (8.1)  | 853                     | (7.9)  | 958                          | (7.8)  | 1,129                   | (7.7)  | 563                    | (8.1)  | 1,864                   | (8.7)  |
| All                              | 445                             | (1.6)  | 122                    | (2.2)  | 273                        | (1.6)  | 159                     | (1.5)  | 203                          | (1.6)  | 216                     | (1.5)  | 143                    | (2.1)  | 351                     | (1.6)  |
| <b>GPs qualified in UK</b>       |                                 |        |                        |        |                            |        |                         |        |                              |        |                         |        |                        |        |                         |        |
| Some                             | 16,964                          | (59.6) | 3,391                  | (59.8) | 10,043                     | (58.6) | 6,260                   | (58.2) | 7,210                        | (58.4) | 8,692                   | (59.0) | 4,158                  | (59.7) | 12,938                  | (60.1) |
| None                             | 1,543                           | (5.4)  | 342                    | (6.0)  | 1,003                      | (5.9)  | 568                     | (5.3)  | 704                          | (5.7)  | 846                     | (5.7)  | 453                    | (6.5)  | 1,367                   | (6.4)  |
| All                              | 9,946                           | (35.0) | 1,933                  | (34.1) | 6,078                      | (35.5) | 3,928                   | (36.5) | 4,426                        | (35.9) | 5,201                   | (35.3) | 2,348                  | (33.7) | 7,215                   | (33.5) |
| <b>GP level deprivation</b>      |                                 |        |                        |        |                            |        |                         |        |                              |        |                         |        |                        |        |                         |        |
| Q1 (least deprived)              | 6,448                           | (22.7) | 1,197                  | (21.1) | 4,202                      | (24.5) | 2,401                   | (22.3) | 2,701                        | (21.9) | 3,261                   | (22.1) | 1,077                  | (15.5) | 3,551                   | (16.5) |
| Q2                               | 6,719                           | (23.6) | 1,286                  | (22.7) | 4,126                      | (24.1) | 2,559                   | (23.8) | 2,853                        | (23.1) | 3,279                   | (22.2) | 1,420                  | (20.4) | 4,244                   | (19.7) |
| Q3                               | 6,206                           | (21.8) | 1,161                  | (20.5) | 3,614                      | (21.1) | 2,364                   | (22.0) | 2,690                        | (21.8) | 3,114                   | (21.1) | 1,385                  | (19.9) | 4,492                   | (20.9) |
| Q4                               | 5,311                           | (18.7) | 1,074                  | (19.0) | 2,996                      | (17.5) | 1,982                   | (18.4) | 2,349                        | (19.0) | 2,897                   | (19.7) | 1,539                  | (22.1) | 4,831                   | (22.4) |
| Q5 (most deprived)               | 3,769                           | (13.2) | 948                    | (16.7) | 2,186                      | (12.8) | 1,450                   | (13.5) | 1,747                        | (14.2) | 2,188                   | (14.8) | 1,538                  | (22.1) | 4,402                   | (20.5) |
| <b>GP rurality</b>               |                                 |        |                        |        |                            |        |                         |        |                              |        |                         |        |                        |        |                         |        |
| Urban                            | 22,789                          | (80.1) | 4,696                  | (82.9) | 13,405                     | (78.3) | 8,575                   | (79.7) | 9,975                        | (80.8) | 11,974                  | (81.2) | 5,909                  | (84.9) | 18,259                  | (84.8) |
| Town                             | 4,583                           | (16.1) | 786                    | (13.9) | 2,938                      | (17.2) | 1,723                   | (16.0) | 1,904                        | (15.4) | 2,219                   | (15.1) | 871                    | (12.5) | 2,686                   | (12.5) |
| Village                          | 1,081                           | (3.8)  | 184                    | (3.2)  | 781                        | (4.6)  | 458                     | (4.3)  | 461                          | (3.7)  | 546                     | (3.7)  | 179                    | (2.6)  | 575                     | (2.7)  |

|                                              |                                                                  |        |        |        |        |        |        |        |        |        |        |        |        |        |        |        |        |
|----------------------------------------------|------------------------------------------------------------------|--------|--------|--------|--------|--------|--------|--------|--------|--------|--------|--------|--------|--------|--------|--------|--------|
| GP practice level - general performance      | <b>Able to book appointment</b>                                  |        |        |        |        |        |        |        |        |        |        |        |        |        |        |        |        |
|                                              | 90% and over                                                     | 12,456 | (43.8) | 2,350  | (41.5) | 7,893  | (46.1) | 4,890  | (45.5) | 5,453  | (44.2) | 6,474  | (43.9) | 2,764  | (39.7) | 8,729  | (40.6) |
|                                              | 80-90%                                                           | 13,671 | (48.0) | 2,772  | (48.9) | 7,804  | (45.6) | 5,028  | (46.7) | 5,873  | (47.6) | 7,006  | (47.5) | 3,535  | (50.8) | 10,761 | (50.0) |
|                                              | <80%                                                             | 2,326  | (8.2)  | 544    | (9.6)  | 1,427  | (8.3)  | 838    | (7.8)  | 1,014  | (8.2)  | 1,259  | (8.5)  | 660    | (9.5)  | 2,030  | (9.4)  |
|                                              | <b>Able to see preferred GP</b>                                  |        |        |        |        |        |        |        |        |        |        |        |        |        |        |        |        |
|                                              | 80% and over                                                     | 7,553  | (26.5) | 1,423  | (25.1) | 4,890  | (28.6) | 3,077  | (28.6) | 3,389  | (27.5) | 4,075  | (27.6) | 1,715  | (24.6) | 5,614  | (26.1) |
|                                              | 60-80%                                                           | 14,229 | (50.0) | 2,824  | (49.8) | 8,335  | (48.7) | 5,298  | (49.3) | 6,171  | (50.0) | 7,255  | (49.2) | 3,464  | (49.8) | 10,508 | (48.8) |
|                                              | <60%                                                             | 6,671  | (23.4) | 1,419  | (25.0) | 3,899  | (22.8) | 2,381  | (22.1) | 2,780  | (22.5) | 3,409  | (23.1) | 1,780  | (25.6) | 5,398  | (25.1) |
|                                              | <b>Total QOF points</b>                                          |        |        |        |        |        |        |        |        |        |        |        |        |        |        |        |        |
|                                              | 990 to 1000 points                                               | 13,836 | (48.6) | 2,690  | (47.5) | 8,466  | (49.4) | 5,189  | (48.2) | 6,029  | (48.9) | 7,184  | (48.7) | 3,259  | (46.8) | 10,270 | (47.7) |
| 980 to 989 points                            | 6,279                                                            | (22.1) | 1,201  | (21.2) | 3,636  | (21.2) | 2,364  | (22.0) | 2,670  | (21.6) | 3,197  | (21.7) | 1,496  | (21.5) | 4,518  | (21.0) |        |
| 960 to 979 points                            | 4,771                                                            | (16.8) | 1,011  | (17.8) | 2,861  | (16.7) | 1,841  | (17.1) | 2,062  | (16.7) | 2,515  | (17.1) | 1,250  | (18.0) | 3,859  | (17.9) |        |
| <960 points                                  | 3,567                                                            | (12.5) | 764    | (13.5) | 2,161  | (12.6) | 1,362  | (12.7) | 1,579  | (12.8) | 1,843  | (12.5) | 954    | (13.7) | 2,873  | (13.4) |        |
| GP practice level - specific cancer activity | <b>Two week wait referral rate</b>                               |        |        |        |        |        |        |        |        |        |        |        |        |        |        |        |        |
|                                              | Q1 (lowest)                                                      | 5,715  | (20.1) | 1,266  | (22.3) | 3,424  | (20.0) | 2,081  | (19.3) | 2,457  | (19.9) | 2,984  | (20.2) | 1,354  | (19.5) | 4,640  | (21.6) |
|                                              | Q2                                                               | 5,622  | (19.8) | 1,096  | (19.3) | 3,408  | (19.9) | 2,077  | (19.3) | 2,464  | (20.0) | 3,035  | (20.6) | 1,428  | (20.5) | 4,464  | (20.7) |
|                                              | Q3                                                               | 5,561  | (19.5) | 1,176  | (20.8) | 3,393  | (19.8) | 2,209  | (20.5) | 2,462  | (20.0) | 2,919  | (19.8) | 1,383  | (19.9) | 4,181  | (19.4) |
|                                              | Q4                                                               | 5,876  | (20.7) | 1,057  | (18.7) | 3,431  | (20.0) | 2,215  | (20.6) | 2,504  | (20.3) | 2,959  | (20.1) | 1,345  | (19.3) | 4,104  | (19.1) |
|                                              | Q5 (highest)                                                     | 5,679  | (20.0) | 1,071  | (18.9) | 3,468  | (20.3) | 2,174  | (20.2) | 2,453  | (19.9) | 2,842  | (19.3) | 1,449  | (20.8) | 4,131  | (19.2) |
|                                              | <b>Two week wait conversion</b>                                  |        |        |        |        |        |        |        |        |        |        |        |        |        |        |        |        |
|                                              | Q1 (lowest)                                                      | 5,850  | (20.6) | 1,251  | (22.1) | 3,391  | (19.8) | 2,029  | (18.9) | 2,469  | (20.0) | 3,020  | (20.5) | 1,619  | (23.3) | 4,503  | (20.9) |
|                                              | Q2                                                               | 5,627  | (19.8) | 1,119  | (19.7) | 3,127  | (18.3) | 2,047  | (19.0) | 2,315  | (18.8) | 2,919  | (19.8) | 1,411  | (20.3) | 4,211  | (19.6) |
|                                              | Q3                                                               | 5,798  | (20.4) | 1,096  | (19.3) | 3,475  | (20.3) | 2,177  | (20.2) | 2,518  | (20.4) | 2,786  | (18.9) | 1,400  | (20.1) | 4,148  | (19.3) |
|                                              | Q4                                                               | 5,675  | (19.9) | 1,107  | (19.5) | 3,555  | (20.8) | 2,210  | (20.5) | 2,643  | (21.4) | 3,007  | (20.4) | 1,262  | (18.1) | 4,258  | (19.8) |
|                                              | Q5 (highest)                                                     | 5,503  | (19.3) | 1,093  | (19.3) | 3,576  | (20.9) | 2,293  | (21.3) | 2,395  | (19.4) | 3,007  | (20.4) | 1,267  | (18.2) | 4,400  | (20.4) |
|                                              | <b>Two week wait detection</b>                                   |        |        |        |        |        |        |        |        |        |        |        |        |        |        |        |        |
|                                              | Q1 (lowest)                                                      | 5,297  | (18.6) | 1,160  | (20.5) | 3,458  | (20.2) | 2,077  | (19.3) | 2,546  | (20.6) | 2,980  | (20.2) | 1,436  | (20.6) | 4,641  | (21.6) |
|                                              | Q2                                                               | 5,418  | (19.0) | 1,144  | (20.2) | 3,466  | (20.2) | 2,126  | (19.8) | 2,420  | (19.6) | 3,006  | (20.4) | 1,432  | (20.6) | 4,356  | (20.2) |
| Q3                                           | 6,411                                                            | (22.5) | 1,255  | (22.1) | 3,891  | (22.7) | 2,536  | (23.6) | 2,793  | (22.6) | 3,359  | (22.8) | 1,571  | (22.6) | 4,816  | (22.4) |        |
| Q4                                           | 5,032                                                            | (17.7) | 911    | (16.1) | 2,756  | (16.1) | 1,860  | (17.3) | 2,198  | (17.8) | 2,450  | (16.6) | 1,136  | (16.3) | 3,534  | (16.4) |        |
| Q5 (highest)                                 | 6,295                                                            | (22.1) | 1,196  | (21.1) | 3,553  | (20.7) | 2,157  | (20.1) | 2,383  | (19.3) | 2,944  | (20.0) | 1,384  | (19.9) | 4,173  | (19.4) |        |
| GP practice level - other                    | <b>Average colonoscopy, sigmoidoscopy and upper GI endoscopy</b> |        |        |        |        |        |        |        |        |        |        |        |        |        |        |        |        |
|                                              | T1 (lowest)                                                      | 9,789  | (34.4) | 1,962  | (34.6) | 5,944  | (34.7) | 3,489  | (32.4) | 3,958  | (32.1) | 4,905  | (33.3) | 2,136  | (30.7) | 6,836  | (31.8) |
|                                              | T2                                                               | 9,335  | (32.8) | 1,761  | (31.1) | 5,595  | (32.7) | 3,624  | (33.7) | 4,026  | (32.6) | 4,932  | (33.5) | 2,261  | (32.5) | 6,801  | (31.6) |
|                                              | T3 (highest)                                                     | 9,329  | (32.8) | 1,943  | (34.3) | 5,585  | (32.6) | 3,643  | (33.9) | 4,356  | (35.3) | 4,902  | (33.3) | 2,562  | (36.8) | 7,883  | (36.6) |
|                                              | <b>Emergency admissions</b>                                      |        |        |        |        |        |        |        |        |        |        |        |        |        |        |        |        |
|                                              | Q1 (lowest)                                                      | 5,747  | (20.2) | 1,231  | (21.7) | 3,514  | (20.5) | 2,086  | (19.4) | 2,353  | (19.1) | 2,866  | (19.4) | 1,341  | (19.3) | 3,989  | (18.5) |
|                                              | Q2                                                               | 5,891  | (20.7) | 1,104  | (19.5) | 3,486  | (20.4) | 2,181  | (20.3) | 2,474  | (20.0) | 2,992  | (20.3) | 1,344  | (19.3) | 4,084  | (19.0) |
| Q3                                           | 5,625                                                            | (19.8) | 1,177  | (20.8) | 3,438  | (20.1) | 2,193  | (20.4) | 2,474  | (20.0) | 2,933  | (19.9) | 1,338  | (19.2) | 4,204  | (19.5) |        |
| Q4                                           | 5,731                                                            | (20.1) | 1,144  | (20.2) | 3,400  | (19.9) | 2,167  | (20.1) | 2,509  | (20.3) | 2,972  | (20.2) | 1,454  | (20.9) | 4,506  | (20.9) |        |
| Q5 (highest)                                 | 5,459                                                            | (19.2) | 1,010  | (17.8) | 3,286  | (19.2) | 2,129  | (19.8) | 2,530  | (20.5) | 2,976  | (20.2) | 1,482  | (21.3) | 4,737  | (22.0) |        |
